# Supplementary material
Source: PubMed Central journal article supplement (PMC7965456)
Supplement: 2050_table.pdf [file 2050_table.pdf]

**On-Line Table: Multivariable logistic regression model: association of different levels of CDS with good outcome<sup>a</sup>**

| CDS Level | OR <sup>b</sup> | 95% CI <sup>c</sup> | P Value |
|-----------|-----------------|---------------------|---------|
| 1         | 0.497           | 0.256–0.966         | .039    |
| 2         | 0.356           | 0.181–0.700         | .003    |
| 3         | 0.132           | 0.035–0.490         | .002    |

<sup>a</sup> In this model, the CDS is naturally coded (thus CDS = 0 is omitted) and the ORs for each level (CDS = 1–3) are in reference to CDS = 0.

<sup>b</sup> OR for good outcome.

<sup>c</sup> 95% CI for the OR.
